# Supplementary material for: Novel HPAIV H5N8 Reassortant (Clade 2.3.4.4b) Detected in Germany
Source: PubMed Central journal article supplement (PMC7150876; doi:10.3390/v12030281), 2020-03-04
Supplement: viruses-12-00281-s001.pdf [file viruses-12-00281-s001.pdf]

## Supplementary Materials: Novel H5N8 Reassortant (clade 2.3.4.4b) detected in Germany

**Figure S1:** Phylogenetic analyses of PB2, PB1, PA, HA, NP, NA, MP and NS sequences done by Maximum Likelihood trees using RAxML with a bootstrap value of 1000 cycles. Trees include the novel reassortant Ger-01-20 (A/white-fronted goose/Germany-BB/AI00018/2020 (root) and A/chicken/Germany-BW/AI00049/2020 – both in blue lettering), and 100 closest relatives according to sequence identity. The red segments cluster with the Ger-01-20 reassortant, all originating in Eastern Europe (Poland and the Czech Republic) from December 2019 – January 2020. The dark green segments pinpoint the HPAIV H5N8 >10-2016 (Nigeria, Korea, India, South Africa) reassortant, while the orange marked sequences stand for the LPAIV H3N8 (Russia, >Aug 2017).

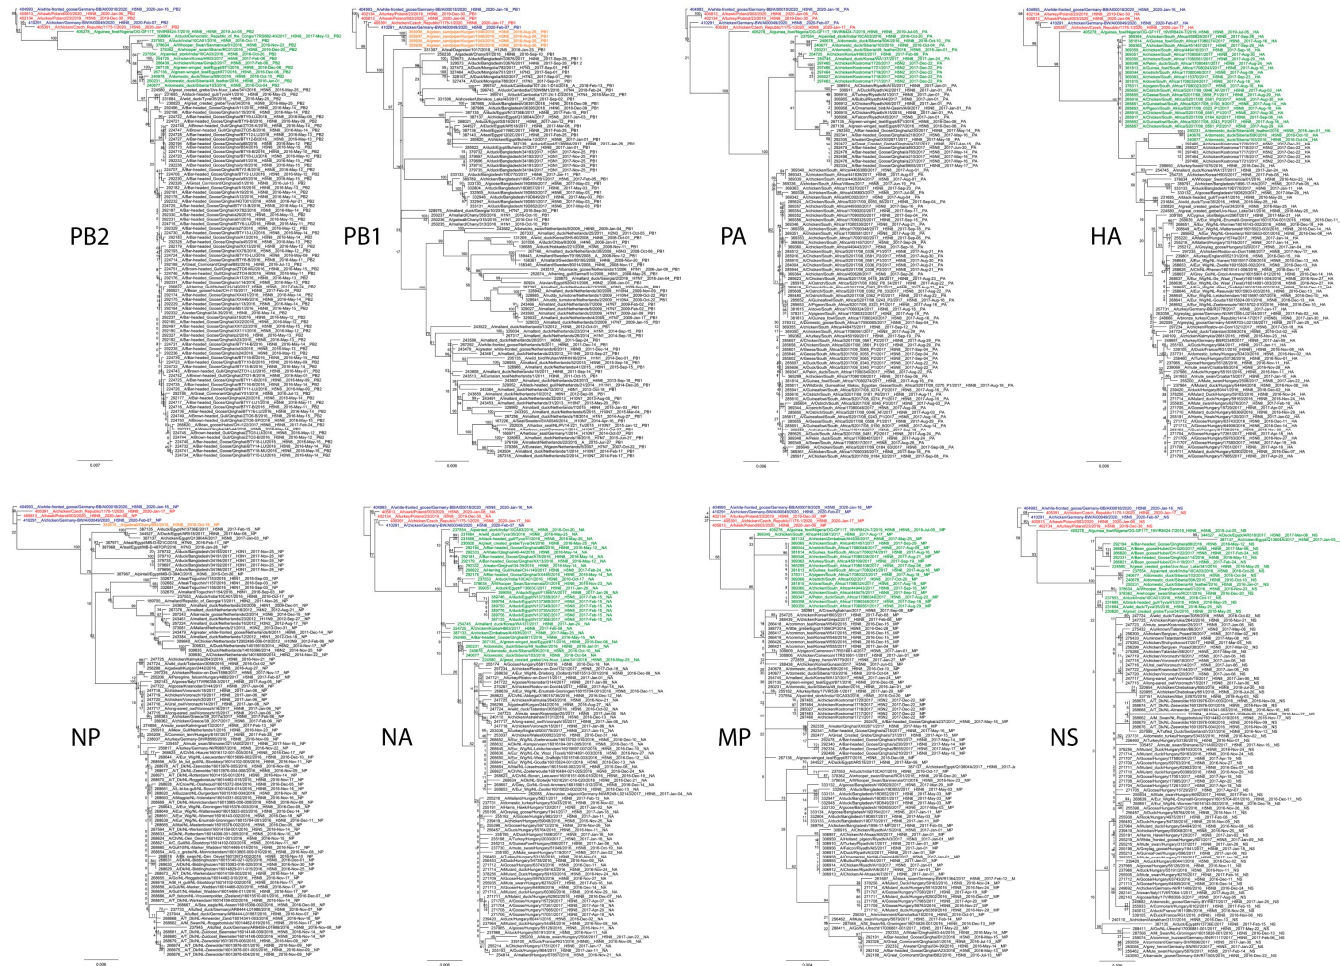

**Table S1:** Sequence identity (%) of A/white-fronted goose/Germany-BB/AI00018/2020 in comparison to the top ten Blast results (executed on the GISAID Platform – 13.02.2020).

|                | <b>ID</b>                | <b>Name</b>                                     | <b>Subtype</b> | <b>Collection Date</b> | <b>Sequence Identity %</b> |
|----------------|--------------------------|-------------------------------------------------|----------------|------------------------|----------------------------|
| <b>PB2</b>     | EPI_ISL_405813           | A/hawk/Poland/003/2020                          | H5N8           | 2020-Jan-06            | 99.96                      |
|                | EPI_ISL_402134           | A/turkey/Poland/23/2019                         | H5N8           | 2019-Dec-30            | 99.93                      |
|                | EPI_ISL_410291           | A/chicken/Germany-BW/AI00049/2020               | H5N8           | 2020-Feb-07            | 99.78                      |
|                | EPI_ISL_405391           | A/chicken/Czech_Republic/1175-1/2020            | H5N8           | 2020-Jan-17            | 99.61                      |
|                | EPI_ISL_405278           | A/guinea_fowl/Nigeria/OG-GF11T_19VIR8424-7/2019 | H5N8           | 2019-Jul-05            | 98.86                      |
|                | EPI_ISL_237554           | A/painted_stork/India/10CA03/2016               | H5N8           | 2016-Oct-20            | 97.65                      |
|                | EPI_ISL_240677           | A/domestic_duck/Siberia/103/2016                | H5N8           | 2016-Oct-04            | 97.58                      |
|                | EPI_ISL_250231           | A/domestic_duck/Siberia/49_feather/2016         | H5N8           | 2016-Jan-01            | 97.58                      |
|                | EPI_ISL_267135           | A/green-winged_teal/Egypt/871/2016              | H5N8           | 2016-Dec-08            | 97.56                      |
|                | EPI_ISL_224580           | A/great_crested_grebe/Uvs-Nuur_Lake/341/2016    | H5N8           | 2016-May-25            | 97.50                      |
| EPI_ISL_237553 | A/duck/India/10CA01/2016 | H5N8                                            | 2016-Oct-17    | 97.50                  |                            |
| <b>PB1</b>     | EPI_ISL_402134           | A/turkey/Poland/23/2019                         | H5N8           | 2019-Dec-30            | 99.83                      |
|                | EPI_ISL_405813           | A/hawk/Poland/003/2020                          | H5N8           | 2020-Jan-06            | 99.82                      |
|                | EPI_ISL_405391           | A/chicken/Czech_Republic/1175-1/2020            | H5N8           | 2020-Jan-17            | 99.61                      |
|                | EPI_ISL_410291           | A/chicken/Germany-BW/AI00049/2020               | H5N8           | 2020-Feb-07            | 99.46                      |
|                | EPI_ISL_355938           | A/green_sandpiper/Kurgan/1050/2018              | H3N8           | 2018-Aug-26            | 99.01                      |
|                | EPI_ISL_331307           | A/teal/Dagestan/1017/2018                       | H12N5          | 2018-Jan-23            | 98.72                      |
|                | EPI_ISL_250237           | A/mallard/Chany/355/2016                        | H1N1           | 2016-Oct-10            | 98.71                      |
|                | EPI_ISL_250236           | A/gadwall/Chany/315/2016                        | H1N1           | 2016-Oct-10            | 98.71                      |
|                | EPI_ISL_250235           | A/mallard/Chany/313/2016                        | H1N1           | 2016-Oct-10            | 98.71                      |
|                | EPI_ISL_328976           | A/mallard_duck/Georgia/10/2016                  | H7N7           | 2016-Sep-30            | 98.66                      |
| EPI_ISL_250238 | A/gadwall/Chany/97/2016  | H6N8                                            | 2016-Sep-10    | 98.62                  |                            |
| <b>PA</b>      | EPI_ISL_410291           | A/chicken/Germany-BW/AI00049/2020               | H5N8           | 2020-Feb-07            | 99.77                      |
|                | EPI_ISL_405813           | A/hawk/Poland/003/2020                          | H5N8           | 2020-Jan-06            | 99.72                      |
|                | EPI_ISL_402134           | A/turkey/Poland/23/2019                         | H5N8           | 2019-Dec-30            | 99.72                      |
|                | EPI_ISL_405391           | A/chicken/Czech_Republic/1175-1/2020            | H5N8           | 2020-Jan-17            | 99.55                      |
|                | EPI_ISL_405278           | A/guinea_fowl/Nigeria/OG-GF11T_19VIR8424-7/2019 | H5N8           | 2019-Jul-05            | 98.98                      |
|                | EPI_ISL_378312           | A/Domestic_goose/South_Africa/17090065/2017     | H5N8           | 2017-Sep-04            | 98.51                      |
|                | EPI_ISL_369355           | A/chicken/South_Africa/448475/2017              | H5N8           | 2017-Sep-12            | 98.51                      |

|           |                |                                                 |      |             |        |
|-----------|----------------|-------------------------------------------------|------|-------------|--------|
|           | EPI_ISL_369339 | A/chicken/South_Africa/440638A/2017             | H5N8 | 2017-Aug-01 | 98.51  |
|           | EPI_ISL_369336 | A/chicken/South_Africa/Villiers/2017            | H5N8 | 2017-Jun-19 | 98.51  |
|           | EPI_ISL_285657 | A/Chicken/South_Africa/S2017/08_0561_P2/2017    | H5N8 | 2017-Aug-29 | 98.50  |
|           | EPI_ISL_285648 | A/Geese/South_Africa/S2017/09_0055_P1/2017      | H5N8 | 2017-Sep-04 | 98.50  |
| <b>HA</b> | EPI_ISL_405813 | A/hawk/Poland/003/2020                          | H5N8 | 2020-Jan-06 | 100.00 |
|           | EPI_ISL_402134 | A/turkey/Poland/23/2019                         | H5N8 | 2019-Dec-30 | 100.00 |
|           | EPI_ISL_410291 | A/chicken/Germany-BW/AI00049/2020               | H5N8 | 2020-Feb-07 | 99.60  |
|           | EPI_ISL_405391 | A/chicken/Czech_Republic/1175-1/2020            | H5N8 | 2020-Jan-17 | 99.54  |
|           | EPI_ISL_405278 | A/guinea_fowl/Nigeria/OG-GF11T_19VIR8424-7/2019 | H5N8 | 2019-Jul-05 | 99.06  |
|           | EPI_ISL_381815 | A/dove/South_Africa/17080324/2017               | H5N8 | 2017-Aug-18 | 98.42  |
|           | EPI_ISL_381813 | A/Guinea_fowl/South_Africa/17080243/2017        | H5N8 | 2017-Aug-16 | 98.42  |
|           | EPI_ISL_378311 | A/pigeon/South_Africa/17080323/2017             | H5N8 | 2017-Aug-18 | 98.42  |
|           | EPI_ISL_369359 | A/chicken/South_Africa/449418/2017              | H5N8 | 2017-Sep-18 | 98.42  |
|           | EPI_ISL_369351 | A/chicken/South_Africa/17080581/2017            | H5N8 | 2017-Aug-30 | 98.42  |
|           | EPI_ISL_369348 | A/Pekin_duck/South_Africa/17080481/2017         | H5N8 | 2017-Aug-24 | 98.42  |
| <b>NP</b> | EPI_ISL_410291 | A/chicken/Germany-BW/AI00049/2020               | H5N8 | 2020-Feb-07 | 99.81  |
|           | EPI_ISL_405813 | A/hawk/Poland/003/2020                          | H5N8 | 2020-Jan-06 | 99.79  |
|           | EPI_ISL_405391 | A/chicken/Czech_Republic/1175-1/2020            | H5N8 | 2020-Jan-17 | 99.57  |
|           | EPI_ISL_387968 | A/teal/Egypt/MB-D-487OP/2016                    | H7N3 | 2016-Jan-28 | 98.51  |
|           | EPI_ISL_333615 | A/gadwall/Chany/893/2018                        | H3N8 | 2018-Oct-19 | 98.51  |
|           | EPI_ISL_387971 | A/teal/Egypt/MB-D-621C/2016                     | H7N9 | 2016-Feb-11 | 98.44  |
|           | EPI_ISL_387967 | A/pintail/Egypt/MB-D-384C/2015                  | H3N6 | 2015-Oct-26 | 98.25  |
|           | EPI_ISL_387135 | A/duck/Egypt/N13736E/2017                       | H5N8 | 2017-Feb-15 | 97.99  |
|           | EPI_ISL_344527 | A/Duck/Egypt/AR518/2017                         | H5N8 | 2017-Mar-08 | 97.99  |
|           | EPI_ISL_387137 | A/chicken/Egypt/Q13804A/2017                    | H5N8 | 2017-Jan-03 | 97.92  |
|           | EPI_ISL_189700 | A/mallard/Republic_of_Georgia/13/2011           | H6N2 | 2011-Nov-26 | 97.84  |
| <b>NA</b> | EPI_ISL_402134 | A/turkey/Poland/23/2019                         | H5N8 | 2019-Dec-30 | 99.68  |
|           | EPI_ISL_405813 | A/hawk/Poland/003/2020                          | H5N8 | 2020-Jan-06 | 99.58  |
|           | EPI_ISL_410291 | A/chicken/Germany-BW/AI00049/2020               | H5N8 | 2020-Feb-07 | 99.55  |
|           | EPI_ISL_405391 | A/chicken/Czech_Republic/1175-1/2020            | H5N8 | 2020-Jan-17 | 99.47  |
|           | EPI_ISL_250231 | A/domestic_duck/Siberia/49_feather/2016         | H5N8 | 2016-Jan-01 | 98.56  |
|           | EPI_ISL_237554 | A/painted_stork/India/10CA03/2016               | H5N8 | 2016-Oct-20 | 98.50  |

|           |                |                                                 |      |             |        |
|-----------|----------------|-------------------------------------------------|------|-------------|--------|
|           | EPI_ISL_254725 | A/chicken/Korea/H903/2017                       | H5N8 | 2017-Feb-08 | 98.49  |
|           | EPI_ISL_387133 | A/chicken/Zimbabwe/AI4935/2017                  | H5N8 | 2017-May-25 | 98.48  |
|           | EPI_ISL_292495 | A/Bar-headed_Goose/Qinghai/B11/2016             | H5N8 | 2016-May-15 | 98.48  |
|           | EPI_ISL_240677 | A/domestic_duck/Siberia/103/2016                | H5N8 | 2016-Oct-04 | 98.43  |
| <b>MP</b> | EPI_ISL_410291 | A/chicken/Germany-BW/AI00049/2020               | H5N8 | 2020-Feb-07 | 100.00 |
|           | EPI_ISL_405813 | A/hawk/Poland/003/2020                          | H5N8 | 2020-Jan-06 | 100.00 |
|           | EPI_ISL_402134 | A/turkey/Poland/23/2019                         | H5N8 | 2019-Dec-30 | 100.00 |
|           | EPI_ISL_405391 | A/chicken/Czech_Republic/1175-1/2020            | H5N8 | 2020-Jan-17 | 99.90  |
|           | EPI_ISL_369345 | A/chicken/South_Africa/443397/2017              | H5N8 | 2017-Aug-17 | 99.59  |
|           | EPI_ISL_267135 | A/green-winged_teal/Egypt/871/2016              | H5N8 | 2016-Dec-08 | 99.50  |
|           | EPI_ISL_250231 | A/domestic_duck/Siberia/49_feather/2016         | H5N8 | 2016-Jan-01 | 99.50  |
|           | EPI_ISL_240677 | A/domestic_duck/Siberia/103/2016                | H5N8 | 2016-Oct-04 | 99.50  |
|           | EPI_ISL_254745 | A/mallard_duck/Korea/WA137/2017                 | H5N8 | 2017-Jan-24 | 99.50  |
|           | EPI_ISL_388773 | A/little_grebe/Egypt/1056OP/2016                | H5N8 | 2016-Dec-28 | 99.49  |
|           | EPI_ISL_266421 | A/common_teal/Korea/W555/2017                   | H5N8 | 2017-Jan-04 | 99.49  |
| <b>NS</b> | EPI_ISL_410291 | A/chicken/Germany-BW/AI00049/2020               | H5N8 | 2020-Feb-07 | 99.83  |
|           | EPI_ISL_405813 | A/hawk/Poland/003/2020                          | H5N8 | 2020-Jan-06 | 99.76  |
|           | EPI_ISL_402134 | A/turkey/Poland/23/2019                         | H5N8 | 2019-Dec-30 | 99.64  |
|           | EPI_ISL_405391 | A/chicken/Czech_Republic/1175-1/2020            | H5N8 | 2020-Jan-17 | 99.53  |
|           | EPI_ISL_405278 | A/guinea_fowl/Nigeria/OG-GF11T_19VIR8424-7/2019 | H5N8 | 2019-Jul-05 | 99.16  |
|           | EPI_ISL_237553 | A/duck/India/10CA01/2016                        | H5N8 | 2016-Oct-17 | 98.61  |
|           | EPI_ISL_231685 | A/black-headed_gull/Tyva/41/2016                | H5N8 | 2016-May-25 | 98.61  |
|           | EPI_ISL_231684 | A/wild_duck/Tyva/35/2016                        | H5N8 | 2016-May-25 | 98.61  |
|           | EPI_ISL_230820 | A/great_crested_grebe/Tyva/34/2016              | H5N8 | 2016-May-25 | 98.61  |
|           | EPI_ISL_292194 | A/Bar-headed_Goose/Qinghai/a88/2016             | H5N8 | 2016-May-12 | 98.60  |
|           | EPI_ISL_266820 | A/Bean_goose/Hubei/CH-i122/2017                 | H5N8 | 2017-Feb-24 | 98.60  |

**Table S2:** Data acknowledgement – We acknowledge the following laboratories for providing sequences in the EpiFlu™ Database.

| Isolate ID     | Isolate Name                                                                   | Submitting Lab                                           |
|----------------|--------------------------------------------------------------------------------|----------------------------------------------------------|
| EPI_ISL_355938 | A/green_sandpiper/Kurgan/1050/2018                                             | State Research Center of Virology and Biotechnology      |
| EPI_ISL_355937 | A/green_sandpiper/Kurgan/1048/2018                                             | State Research Center of Virology and Biotechnology      |
| EPI_ISL_355936 | A/green_sandpiper/Kurgan/1046/2018                                             | State Research Center of Virology and Biotechnology      |
| EPI_ISL_355935 | A/green_sandpiper/Kurgan/1043/2018                                             | State Research Center of Virology and Biotechnology      |
| EPI_ISL_250237 | A/mallard/Chany/355/2016                                                       | Research Institute of Experimental and Clinical Medicine |
| EPI_ISL_250236 | A/gadwall/Chany/315/2016                                                       | Research Institute of Experimental and Clinical Medicine |
| EPI_ISL_250235 | A/mallard/Chany/313/2016                                                       | Research Institute of Experimental and Clinical Medicine |
| EPI_ISL_250238 | A/gadwall/Chany/97/2016                                                        | Research Institute of Experimental and Clinical Medicine |
| EPI_ISL_331306 | A/shoveler/Ubinskoe_Lake/43/2017                                               | Research Institute of Experimental and Clinical Medicine |
| EPI_ISL_331307 | A/teal/Dagestan/1017/2018                                                      | Research Institute of Experimental and Clinical Medicine |
| EPI_ISL_167226 | A/Seal/Sweden/SVA0546/2014                                                     | National Veterinary Institute, Uppsala, Sweden           |
| EPI_ISL_285657 | A/Chicken/South_Africa/S2017/08_0561_P2/2017                                   | National Institute for Communicable Diseases             |
| EPI_ISL_285648 | A/Geese/South_Africa/S2017/09_0055_P1/2017                                     | National Institute for Communicable Diseases             |
| EPI_ISL_378312 | A/Domestic_goose/South_Africa/17090065/2017                                    | National Institute for Communicable Diseases             |
| EPI_ISL_369355 | A/chicken/South_Africa/448475/2017                                             | National Institute for Communicable Diseases             |
| EPI_ISL_285601 | A/Geese/South_Africa/S2017/09_0065_P1/2017                                     | National Institute for Communicable Diseases             |
| EPI_ISL_285611 | A/Wildbirds_Guineafowl_Makou_Egyptian_Geese/South_Africa/S2017/08_0275_P1/2017 | National Institute for Communicable Diseases             |
| EPI_ISL_381814 | A/Guinea_fowl/South_Africa/17080274/2017                                       | National Institute for Communicable Diseases             |
| EPI_ISL_285941 | A/Guineafowl/South_Africa/S2017/08_0274_P2/2017                                | National Institute for Communicable Diseases             |
| EPI_ISL_369350 | A/chicken/South_Africa/17080561/2017                                           | National Institute for Communicable Diseases             |
| EPI_ISL_285607 | A/Duck/South_Africa/S2017/08_0340_P2/2017                                      | National Institute for Communicable Diseases             |
| EPI_ISL_285606 | A/Duck/South_Africa/S2017/08_0340_P1/2017                                      | National Institute for Communicable Diseases             |
| EPI_ISL_369347 | A/Pekin_duck/South_Africa/17080340/2017                                        | National Institute for Communicable Diseases             |
| EPI_ISL_365299 | A/chicken/South_Africa/17090108/2017                                           | National Institute for Communicable Diseases             |
| EPI_ISL_285651 | A/Guineafowl/South_Africa/S2017/08_0190_9/2017                                 | National Institute for Communicable Diseases             |
| EPI_ISL_369349 | A/Swan/South_Africa/17080517/2017                                              | National Institute for Communicable Diseases             |
| EPI_ISL_369348 | A/Pekin_duck/South_Africa/17080481/2017                                        | National Institute for Communicable Diseases             |
| EPI_ISL_369361 | A/chicken/South_Africa/17090335/2017                                           | National Institute for Communicable Diseases             |
| EPI_ISL_285610 | A/Guineafowl/South_Africa/S2017/08_0274_P1/2017                                | National Institute for Communicable Diseases             |
| EPI_ISL_285916 | A/Chicken/South_Africa/S2017/08_0581_P2/2017                                   | National Institute for Communicable Diseases             |
| EPI_ISL_369351 | A/chicken/South_Africa/17080581/2017                                           | National Institute for Communicable Diseases             |
| EPI_ISL_369346 | A/chicken/South_Africa/17080336/2017                                           | National Institute for Communicable Diseases             |
| EPI_ISL_285624 | A/Chicken/South_Africa/S2017/09_0050_56/2017                                   | National Institute for Communicable Diseases             |
| EPI_ISL_369357 | A/chicken/South_Africa/449300/2017                                             | National Institute for Communicable Diseases             |
| EPI_ISL_369356 | A/chicken/South_Africa/17090325/2017                                           | National Institute for Communicable Diseases             |
| EPI_ISL_369354 | A/chicken/South_Africa/17090202/2017                                           | National Institute for Communicable Diseases             |
| EPI_ISL_369352 | A/chicken/South_Africa/17090050/2017                                           | National Institute for Communicable Diseases             |
| EPI_ISL_285652 | A/Guineafowl/South_Africa/S2017/08_0243_P2/2017                                | National Institute for Communicable Diseases             |
| EPI_ISL_381815 | A/dove/South_Africa/17080324/2017                                              | National Institute for Communicable Diseases             |
| EPI_ISL_381813 | A/Guinea_fowl/South_Africa/17080243/2017                                       | National Institute for Communicable Diseases             |
| EPI_ISL_378311 | A/pigeon/South_Africa/17080323/2017                                            | National Institute for Communicable Diseases             |
| EPI_ISL_369360 | A/chicken/South_Africa/449443/2017                                             | National Institute for Communicable Diseases             |

|                |                                                 |                                                          |
|----------------|-------------------------------------------------|----------------------------------------------------------|
| EPI_ISL_369353 | A/chicken/South_Africa/17090100/2017            | National Institute for Communicable Diseases             |
| EPI_ISL_284004 | A/Chicken/South_Africa/S2017/08_0336_P3/2017    | National Institute for Communicable Diseases             |
| EPI_ISL_369364 | A/chicken/South_Africa/450628/2017              | National Institute for Communicable Diseases             |
| EPI_ISL_285623 | A/Chicken/South_Africa/S2017/08_0416_38/2017    | National Institute for Communicable Diseases             |
| EPI_ISL_369358 | A/chicken/South_Africa/17090348/2017            | National Institute for Communicable Diseases             |
| EPI_ISL_369365 | A/chicken/South_Africa/451457/2017              | National Institute for Communicable Diseases             |
| EPI_ISL_285915 | A/Chicken/South_Africa/S2017/08_0581_P1/2017    | National Institute for Communicable Diseases             |
| EPI_ISL_285655 | A/Geese/South_Africa/S2017/08_0558_P1/2017      | National Institute for Communicable Diseases             |
| EPI_ISL_369359 | A/chicken/South_Africa/449418/2017              | National Institute for Communicable Diseases             |
| EPI_ISL_285617 | A/Guineafowl/South_Africa/S2017/08_0243_P1/2017 | National Institute for Communicable Diseases             |
| EPI_ISL_285658 | A/Chicken/South_Africa/S2017/08_0561_P1/2017    | National Institute for Communicable Diseases             |
| EPI_ISL_285650 | A/Ostrich/South_Africa/S2017/08_0046_AF/2017    | National Institute for Communicable Diseases             |
| EPI_ISL_369344 | A/ostrich/South_Africa/17080046/2017            | National Institute for Communicable Diseases             |
| EPI_ISL_369362 | A/turkey/South_Africa/450199/2017               | National Institute for Communicable Diseases             |
| EPI_ISL_285649 | A/Chicken/South_Africa/S2017/09_0184_63/2017    | National Institute for Communicable Diseases             |
| EPI_ISL_285602 | A/Geese/South_Africa/S2017/09_0065_P2/2017      | National Institute for Communicable Diseases             |
| EPI_ISL_285918 | A/Ostrich/South_Africa/S2017/08_0362_P8_34/2017 | National Institute for Communicable Diseases             |
| EPI_ISL_285618 | A/Ostrich/South_Africa/S2017/08_0362_P7/2017    | National Institute for Communicable Diseases             |
| EPI_ISL_285608 | A/Ostrich/South_Africa/S2017/08_0362_P8_33/2017 | National Institute for Communicable Diseases             |
| EPI_ISL_369343 | A/chicken/South_Africa/441839/2017              | National Institute for Communicable Diseases             |
| EPI_ISL_369339 | A/chicken/South_Africa/440638A/2017             | National Institute for Communicable Diseases             |
| EPI_ISL_369340 | A/chicken/South_Africa/440638B/2017             | National Institute for Communicable Diseases             |
| EPI_ISL_369336 | A/chicken/South_Africa/Villiers/2017            | National Institute for Communicable Diseases             |
| EPI_ISL_369342 | A/chicken/South_Africa/MC002/2017               | National Institute for Communicable Diseases             |
| EPI_ISL_369338 | A/chicken/South_Africa/436893/2017              | National Institute for Communicable Diseases             |
| EPI_ISL_381811 | A/Speckled_pigeon/South_Africa/08-004B/2017     | National Institute for Communicable Diseases             |
| EPI_ISL_369363 | A/chicken/South_Africa/115370/2017              | National Institute for Communicable Diseases             |
| EPI_ISL_285653 | A/Pigeon/South_Africa/S2017/08_0323_P1/2017     | National Institute for Communicable Diseases             |
| EPI_ISL_285604 | A/Ostrich/South_Africa/S2017/08_0046_P3/2017    | National Institute for Communicable Diseases             |
| EPI_ISL_285917 | A/Chicken/South_Africa/S2017/09_0184_62/2017    | National Institute for Communicable Diseases             |
| EPI_ISL_285625 | A/Duck/South_Africa/S2017/08_0481_P2/2017       | National Institute for Communicable Diseases             |
| EPI_ISL_285944 | A/Chicken/South_Africa/S2017/08_0336_P2/2017    | National Institute for Communicable Diseases             |
| EPI_ISL_285480 | A/Ostrich/South_Africa/S2017/08_0362_P10/2017   | National Institute for Communicable Diseases             |
| EPI_ISL_285512 | A/Chicken/South_Africa/S2017/08_0336_P1/2017    | National Institute for Communicable Diseases             |
| EPI_ISL_285616 | A/Ostrich/South_Africa/S2017/08_0161_P8/2017    | National Institute for Communicable Diseases             |
| EPI_ISL_369345 | A/chicken/South_Africa/443397/2017              | National Institute for Communicable Diseases             |
| EPI_ISL_237554 | A/painted_stork/India/10CA03/2016               | ICAR-National Institute of High Security Animal Diseases |
| EPI_ISL_240677 | A/domestic_duck/Siberia/103/2016                | Research Institute of Experimental and Clinical Medicine |
| EPI_ISL_250231 | A/domestic_duck/Siberia/49_feather/2016         | Research Institute of Experimental and Clinical Medicine |
| EPI_ISL_240678 | A/domestic_duck/Siberia/50K/2016                | Research Institute of Experimental and Clinical Medicine |
| EPI_ISL_297466 | A/chicken/Kostroma/1721/2017                    | State Research Center of Virology and Biotechnology      |
| EPI_ISL_297465 | A/chicken/Kostroma/1720/2017                    | State Research Center of Virology and Biotechnology      |
| EPI_ISL_297464 | A/chicken/Kostroma/1719/2017                    | State Research Center of Virology and Biotechnology      |
| EPI_ISL_297463 | A/chicken/Kostroma/1717/2017                    | State Research Center of Virology and Biotechnology      |
| EPI_ISL_295027 | A/chicken/Kostroma/1718/2017                    | State Research Center of Virology and Biotechnology      |

|                |                                             |                                                               |
|----------------|---------------------------------------------|---------------------------------------------------------------|
| EPI_ISL_254745 | A/mallard_duck/Korea/WA137/2017             | Animal and Plant Quarantine Agency (S-2026)                   |
| EPI_ISL_254725 | A/chicken/Korea/H903/2017                   | Animal and Plant Quarantine Agency (S-2026)                   |
| EPI_ISL_292498 | A/Bar-headed_Goose/Qinghai/a210/2017        | Wuhan Institute of Virology                                   |
| EPI_ISL_292479 | A/Bar-headed_Goose/Qinghai/a893/2017        | Wuhan Institute of Virology                                   |
| EPI_ISL_292478 | A/Bar-headed_Goose/Qinghai/a765/2017        | Wuhan Institute of Virology                                   |
| EPI_ISL_292477 | A/Great_Crested_Grebe/Qinghai/a737/2017     | Wuhan Institute of Virology                                   |
| EPI_ISL_292476 | A/Bar-headed_Goose/Qinghai/a237/2017        | Wuhan Institute of Virology                                   |
| EPI_ISL_292335 | A/water/Qinghai/XXII2871/2017               | Wuhan Institute of Virology                                   |
| EPI_ISL_292334 | A/Bar-headed_Goose/Qinghai/B655/2017        | Wuhan Institute of Virology                                   |
| EPI_ISL_292341 | A/Bar-headed_Goose/Qinghai/a218/2017        | Wuhan Institute of Virology                                   |
| EPI_ISL_292340 | A/Bar-headed_Goose/Qinghai/a230/2017        | Wuhan Institute of Virology                                   |
| EPI_ISL_306958 | A/Ornamental_bird/Al-Qasim/AI9/2017         | Wuhan Institute of Virology                                   |
| EPI_ISL_306956 | A/Falcon/Riyadh/AI5/2017                    | Center of Influenza Research, University of Hong Kong         |
| EPI_ISL_306955 | A/Bulbul/Riyadh/AI4/2017                    | Center of Influenza Research, University of Hong Kong         |
| EPI_ISL_306915 | A/Chicken/Riyadh/A15/2018                   | Center of Influenza Research, University of Hong Kong         |
| EPI_ISL_306912 | A/Chicken/Riyadh/AI6/2017                   | Center of Influenza Research, University of Hong Kong         |
| EPI_ISL_306910 | A/Turkey/Riyadh/AI1/2017                    | Center of Influenza Research, University of Hong Kong         |
| EPI_ISL_306914 | A/Chicken/Riyadh/AI10/2017                  | Center of Influenza Research, University of Hong Kong         |
| EPI_ISL_306959 | A/Holland_pigeon/Riyadh/AI3/2017            | Center of Influenza Research, University of Hong Kong         |
| EPI_ISL_306957 | A/Chicken/Al-Ahsaa/AI8/2017                 | Center of Influenza Research, University of Hong Kong         |
| EPI_ISL_306913 | A/Chicken/Al-Ahsaa/AI7/2017                 | Center of Influenza Research, University of Hong Kong         |
| EPI_ISL_306911 | A/Duck/Riyadh/AI2/2017                      | Center of Influenza Research, University of Hong Kong         |
| EPI_ISL_231685 | A/black-headed_gull/Tyva/41/2016            | WHO National Influenza Centre Russian Federation              |
| EPI_ISL_231684 | A/wild_duck/Tyva/35/2016                    | WHO National Influenza Centre Russian Federation              |
| EPI_ISL_230820 | A/great_crested_grebe/Tyva/34/2016          | WHO National Influenza Centre Russian Federation              |
| EPI_ISL_240109 | A/chicken/Kalmykia/2661/2016                | State Research Center of Virology and Biotechnology           |
| EPI_ISL_248666 | A/bronze_turkey/Czech_Republic/1414-17/2017 | State Veterinary Institute Prague                             |
| EPI_ISL_247724 | A/wild_duck/Tatarstan/3059/2016             | State Research Center of Virology and Biotechnology           |
| EPI_ISL_297234 | A/chicken/Rostov-on-Don/1321/2017           | State Research Center of Virology and Biotechnology           |
| EPI_ISL_237965 | A/goose/Hungary/55128/2016                  | Central Agricultural Office Veterinary Diagnostic Directorate |
| EPI_ISL_239069 | A/mute_swan/Croatia/85/2016                 | Croatian Veterinary Institute                                 |
| EPI_ISL_237731 | A/domestic_turkey/Hungary/53433/2016        | Central Agricultural Office Veterinary Diagnostic Directorate |
| EPI_ISL_256460 | A/Turkey/Hungary/53136/2016                 | Central Agricultural Office Veterinary Diagnostic Directorate |
| EPI_ISL_238197 | A/mute_swan/Croatia/78/2016                 | Croatian Veterinary Institute                                 |
| EPI_ISL_255193 | A/Duck/Hungary/984/2017                     | Central Agricultural Office Veterinary Diagnostic Directorate |
| EPI_ISL_378256 | A/Mulard_Duck/Hungary/59163/2016            | Central Agricultural Office Veterinary Diagnostic Directorate |
| EPI_ISL_271714 | A/Mulard_duck/Hungary/59163/2016            | Central Agricultural Office Veterinary Diagnostic Directorate |
| EPI_ISL_255935 | A/Mute_swan/Hungary/6276/2017               | Central Agricultural Office Veterinary Diagnostic Directorate |
| EPI_ISL_239420 | A/duck/Hungary/60441/2016                   | Central Agricultural Office Veterinary Diagnostic Directorate |
| EPI_ISL_271711 | A/Mulard_duck/Hungary/62902/2016            | Central Agricultural Office Veterinary Diagnostic Directorate |
| EPI_ISL_271710 | A/Mulard_duck/Hungary/60369/2016            | Central Agricultural Office Veterinary Diagnostic Directorate |
| EPI_ISL_271708 | A/Goose/Hungary/17985/2017                  | Central Agricultural Office Veterinary Diagnostic Directorate |
| EPI_ISL_271706 | A/Goose/Hungary/17051/2017                  | Central Agricultural Office Veterinary Diagnostic Directorate |
| EPI_ISL_271705 | A/Goose/Hungary/15729/2017                  | Central Agricultural Office Veterinary Diagnostic Directorate |
| EPI_ISL_271704 | A/Goose/Hungary/17261/2017                  | Central Agricultural Office Veterinary Diagnostic Directorate |

|                |                                                   |                                                               |
|----------------|---------------------------------------------------|---------------------------------------------------------------|
| EPI_ISL_256453 | A/Duck/Hungary/54738/2016                         | Central Agricultural Office Veterinary Diagnostic Directorate |
| EPI_ISL_255191 | A/Harris_Hawk/Hungary/120/2017                    | Central Agricultural Office Veterinary Diagnostic Directorate |
| EPI_ISL_237964 | A/Mulard_duck/Hungary/54494/2016                  | Central Agricultural Office Veterinary Diagnostic Directorate |
| EPI_ISL_271713 | A/Goose/Hungary/64909/2016                        | Central Agricultural Office Veterinary Diagnostic Directorate |
| EPI_ISL_271712 | A/Goose/Hungary/63743/2016                        | Central Agricultural Office Veterinary Diagnostic Directorate |
| EPI_ISL_271709 | A/Goose/Hungary/59763/2016                        | Central Agricultural Office Veterinary Diagnostic Directorate |
| EPI_ISL_271707 | A/Goose/Hungary/17580/2017                        | Central Agricultural Office Veterinary Diagnostic Directorate |
| EPI_ISL_255937 | A/Pheasant/Hungary/7685/2017                      | Central Agricultural Office Veterinary Diagnostic Directorate |
| EPI_ISL_255936 | A/Pheasant/Hungary/6553/2017                      | Central Agricultural Office Veterinary Diagnostic Directorate |
| EPI_ISL_237966 | A/duck/Hungary/55191/2016                         | Central Agricultural Office Veterinary Diagnostic Directorate |
| EPI_ISL_239419 | A/chicken/Hungary/59048/2016                      | Central Agricultural Office Veterinary Diagnostic Directorate |
| EPI_ISL_255938 | A/Rook/Hungary/4975/2017                          | Central Agricultural Office Veterinary Diagnostic Directorate |
| EPI_ISL_256457 | A/Duck/Hungary/55764/2016                         | Central Agricultural Office Veterinary Diagnostic Directorate |
| EPI_ISL_255398 | A/Goose/Hungary/59712/2016                        | Central Agricultural Office Veterinary Diagnostic Directorate |
| EPI_ISL_237730 | A/mute_swan/Hungary/51049/2016                    | Central Agricultural Office Veterinary Diagnostic Directorate |
| EPI_ISL_255212 | A/Greylag_goose/Hungary/320/2017                  | Central Agricultural Office Veterinary Diagnostic Directorate |
| EPI_ISL_255220 | A/Mallard/Hungary/1574a/2017                      | Central Agricultural Office Veterinary Diagnostic Directorate |
| EPI_ISL_255218 | A/Mallard/Hungary/1574b/2017                      | Central Agricultural Office Veterinary Diagnostic Directorate |
| EPI_ISL_297235 | A/chicken/Rostov-on-Don/1598/2017                 | State Research Center of Virology and Biotechnology           |
| EPI_ISL_268652 | A/Eur_Wig/NL-Zoeterwoude/16015702-010/2016        | Wageningen Bioveterinary Research                             |
| EPI_ISL_268645 | A/Eur_Wig/NL-Leidschendam/16015697-007/2016       | Wageningen Bioveterinary Research                             |
| EPI_ISL_268641 | A/Eur_Wig/NL-Gouda/16015824-001/2016              | Wageningen Bioveterinary Research                             |
| EPI_ISL_268637 | A/Eur_Wig/NL-De_Waal_(Texel)/16014891-004/2016    | Wageningen Bioveterinary Research                             |
| EPI_ISL_268636 | A/Eur_Wig/NL-De_Waal_(Texel)/16014891-003/2016    | Wageningen Bioveterinary Research                             |
| EPI_ISL_268657 | A/Grey_Go/NL-Groot-Ammers/16015901-012/2016       | Wageningen Bioveterinary Research                             |
| EPI_ISL_268653 | A/Eur_Wig/NL-Zwolle/16015820-002/2016             | Wageningen Bioveterinary Research                             |
| EPI_ISL_268626 | A/Ch/NL-Rhenen/16016141-006/2016                  | Wageningen Bioveterinary Research                             |
| EPI_ISL_268650 | A/Eur_Wig/NL-West_Grafdijk/16015746-003/2016      | Wageningen Bioveterinary Research                             |
| EPI_ISL_268648 | A/Eur_Wig/NL-Vianen/16015917-006/2016             | Wageningen Bioveterinary Research                             |
| EPI_ISL_268646 | A/Eur_Wig/NL-Reeuwijk/16015903-003/2016           | Wageningen Bioveterinary Research                             |
| EPI_ISL_268632 | A/Dk/NL-Kamperveen/16016104-001-005/2016          | Wageningen Bioveterinary Research                             |
| EPI_ISL_239801 | A/turkey/England/052131/2016                      | Animal and Plant Health Agency (APHA)                         |
| EPI_ISL_268627 | A/Ch/NL-Zoeterwoude/16016484-021-025/2016         | Wageningen Bioveterinary Research                             |
| EPI_ISL_268623 | A/Ch/NL-Boven_Leeuwen/16016151-006-010/2016       | Wageningen Bioveterinary Research                             |
| EPI_ISL_268642 | A/Eur_Wig/NL-Greonterp/16015653-001/2016          | Wageningen Bioveterinary Research                             |
| EPI_ISL_275287 | A/chicken/Rostov-on-Don/44/2017                   | State Research Center of Virology and Biotechnology           |
| EPI_ISL_247723 | A/mute_swan/Krasnodar/25/2017                     | State Research Center of Virology and Biotechnology           |
| EPI_ISL_268651 | A/Eur_Wig/NL-Wormer/16016143-002/2016             | Wageningen Bioveterinary Research                             |
| EPI_ISL_268649 | A/Eur_Wig/NL-Walterswald/16015923-003/2016        | Wageningen Bioveterinary Research                             |
| EPI_ISL_268638 | A/Eur_Wig/NL-Drieborg_(Dollard)/16015513-001/2016 | Wageningen Bioveterinary Research                             |
| EPI_ISL_339105 | A/Duck/France/RG1/2016_(H5N8)                     | Ecole Veterinaire de Toulouse                                 |
| EPI_ISL_255934 | A/Mute_swan/Hungary/6092/2017                     | Central Agricultural Office Veterinary Diagnostic Directorate |
| EPI_ISL_255200 | A/Mute_swan/Hungary/2508/2017                     | Central Agricultural Office Veterinary Diagnostic Directorate |
| EPI_ISL_224580 | A/great_crested_grebe/Uvs-Nuur_Lake/341/2016      | Research Institute of Experimental and Clinical Medicine      |
| EPI_ISL_268625 | A/Ch/NL-Hiaure/16016112-001-005/2016              | Wageningen Bioveterinary Research                             |



|                |                                                         |                                                               |
|----------------|---------------------------------------------------------|---------------------------------------------------------------|
| EPI_ISL_333615 | A/gadwall/Chany/893/2018                                | State Research Center of Virology and Biotechnology           |
| EPI_ISL_287564 | A/T_Dk/NL-Werkendam/16014159-001/2016                   | Wageningen Bioveterinary Research                             |
| EPI_ISL_268672 | A/T_Dk/NL-Werkendam/16014159-002/2016                   | Wageningen Bioveterinary Research                             |
| EPI_ISL_268671 | A/T_Dk/NL-Rotterdam/16014155-001/2016                   | Wageningen Bioveterinary Research                             |
| EPI_ISL_268670 | A/T_Dk/NL-Roggebotsluis/16014462-015/2016               | Wageningen Bioveterinary Research                             |
| EPI_ISL_268669 | A/T_Dk/NL-Monnickendam/16013865-006-008/2016            | Wageningen Bioveterinary Research                             |
| EPI_ISL_268666 | A/P_falcon/NL-Vrouwenpolder_(Zeeland)/16015510-001/2016 | Wageningen Bioveterinary Research                             |
| EPI_ISL_268660 | A/Gull10/NL-Marker_Wadden/16014466-014/2016             | Wageningen Bioveterinary Research                             |
| EPI_ISL_268659 | A/Gull1/NL-Marker_Wadden/16014466-011/2016              | Wageningen Bioveterinary Research                             |
| EPI_ISL_268658 | A/Gull/NL-Marker_Wadden/16014466-020/2016               | Wageningen Bioveterinary Research                             |
| EPI_ISL_268656 | A/Gr_bk_bd_gull/NL-Slootdorp/16014102-005/2016          | Wageningen Bioveterinary Research                             |
| EPI_ISL_268655 | A/Go/NL-Roggebotsluis/16014462-010/2016                 | Wageningen Bioveterinary Research                             |
| EPI_ISL_268654 | A/G_c_grebe/NL-Monnickendam/16013865-009-010/2016       | Wageningen Bioveterinary Research                             |
| EPI_ISL_268633 | A/Dk/NL-Rotterdam/16014008-001-005/2016                 | Wageningen Bioveterinary Research                             |
| EPI_ISL_268624 | A/Ch/NL-Den_Oever/16014231-001/2016                     | Wageningen Bioveterinary Research                             |
| EPI_ISL_268621 | A/C_Gull/NL-Slootdorp/16014102-003/2016                 | Wageningen Bioveterinary Research                             |
| EPI_ISL_268619 | A/Bl_H_gull/NL-Slootdorp/16014102-002/2016              | Wageningen Bioveterinary Research                             |
| EPI_ISL_274858 | A/mute_swan/Kaliningrad/132/2017                        | Wageningen Bioveterinary Research                             |
| EPI_ISL_268678 | A/T_Dk/NL-Zeewolde/16013976-005/2016                    | Wageningen Bioveterinary Research                             |
| EPI_ISL_268677 | A/T_Dk/NL-Zeewolde/16013976-004-006/2016                | Wageningen Bioveterinary Research                             |
| EPI_ISL_268665 | A/Mal/NL-Mastenbroek/16015378-002/2016                  | Wageningen Bioveterinary Research                             |
| EPI_ISL_268639 | A/Eur_Wig/NL-Enumatil-Groningen/16015704-001/2016       | Wageningen Bioveterinary Research                             |
| EPI_ISL_268643 | A/Eur_Wig/NL-Groningen/16015376-003/2016                | Wageningen Bioveterinary Research                             |
| EPI_ISL_268663 | A/Magpie/NL-Volendam/16014331-002/2016                  | Wageningen Bioveterinary Research                             |
| EPI_ISL_268661 | A/L-bl-ba-gull/NL-Sovon/16014324-014/2016               | Wageningen Bioveterinary Research                             |
| EPI_ISL_268620 | A/Buzzard/NL-Durgerdam/16015100-004/2016                | Wageningen Bioveterinary Research                             |
| EPI_ISL_268628 | A/Crow/NL-Oostwoud/16015372-004/2016                    | Wageningen Bioveterinary Research                             |
| EPI_ISL_268662 | A/M_Swan/NL-Roggebotsluis/16014462-019/2016             | Wageningen Bioveterinary Research                             |
| EPI_ISL_255209 | A/Common_tern/Hungary/8187/2017                         | Central Agricultural Office Veterinary Diagnostic Directorate |
| EPI_ISL_268681 | A/T_Dk/NL-Zuidoost_Beemster/16014148-009/2016           | Wageningen Bioveterinary Research                             |
| EPI_ISL_268680 | A/T_Dk/NL-Zuidoost_Beemster/16014148-002/2016           | Wageningen Bioveterinary Research                             |
| EPI_ISL_268668 | A/T_Dk/NL-Almeerder_Zand/16014341-003/2016              | Wageningen Bioveterinary Research                             |
| EPI_ISL_268679 | A/T_Dk/NL-Zeewolde/16013976-006/2016                    | Wageningen Bioveterinary Research                             |
| EPI_ISL_268676 | A/T_Dk/NL-Zeewolde/16013976-004/2016                    | Wageningen Bioveterinary Research                             |
| EPI_ISL_268675 | A/T_Dk/NL-Zeewolde/16013976-001-003/2016                | Wageningen Bioveterinary Research                             |
| EPI_ISL_268674 | A/T_Dk/NL-Zeewolde/16013976-001/2016                    | Wageningen Bioveterinary Research                             |
| EPI_ISL_268673 | A/T_Dk/NL-Werkendam/16014159-003/2016                   | Wageningen Bioveterinary Research                             |
| EPI_ISL_268618 | A/Bk_swan/NL-Den_Oever/16013973-002/2016                | Wageningen Bioveterinary Research                             |
| EPI_ISL_255910 | A/Mew_Gull/Netherlands/1/2016                           | Erasmus Medical Center                                        |
| EPI_ISL_268631 | A/Dk/NL-Biddinghuizen/16015145-021-025/2016             | Wageningen Bioveterinary Research                             |
| EPI_ISL_268630 | A/Dk/NL-Biddinghuizen/16015083-016-020/2016             | Wageningen Bioveterinary Research                             |
| EPI_ISL_268629 | A/Dk/NL-Biddinghuizen/16014829-011-015/2016             | Wageningen Bioveterinary Research                             |
| EPI_ISL_268644 | A/Eur_Wig/NL-Leeuwarden/16015699-002/2016               | Wageningen Bioveterinary Research                             |
| EPI_ISL_268682 | A/Teal/NL-Ferwert/16015273-013/2016                     | Wageningen Bioveterinary Research                             |
| EPI_ISL_288363 | A/chicken/Greece/39_2017a/2017                          | Thessalonica Veterinary Centre                                |

|                |                                             |                                                               |
|----------------|---------------------------------------------|---------------------------------------------------------------|
| EPI_ISL_288362 | A/chicken/Greece/39_2017/2017               | Thessalonica Veterinary Centre                                |
| EPI_ISL_256298 | A/gadwall/Kurgan/2442/2016                  | State Research Center of Virology and Biotechnology           |
| EPI_ISL_247725 | A/chicken/Kalmykia/2643/2016                | State Research Center of Virology and Biotechnology           |
| EPI_ISL_247720 | A/chicken/Voronezh/20/2017                  | State Research Center of Virology and Biotechnology           |
| EPI_ISL_247719 | A/chicken/Voronezh/19/2017                  | State Research Center of Virology and Biotechnology           |
| EPI_ISL_247718 | A/chicken/Voronezh/18/2017                  | State Research Center of Virology and Biotechnology           |
| EPI_ISL_247717 | A/long-eared_owl/Voronezh/16/2017           | State Research Center of Virology and Biotechnology           |
| EPI_ISL_247716 | A/Ural_owl/Voronezh/14/2017                 | State Research Center of Virology and Biotechnology           |
| EPI_ISL_247715 | A/long-eared_owl/Voronezh/15/2017           | State Research Center of Virology and Biotechnology           |
| EPI_ISL_282143 | A/goose/Italy/17VIR6358-3/2017              | Istituto Zooprofilattico Sperimentale Delle Venezie           |
| EPI_ISL_282141 | A/swan/Italy/17VIR7064-1/2017               | Istituto Zooprofilattico Sperimentale Delle Venezie           |
| EPI_ISL_247722 | A/goose/Krasnodar/3144/2017                 | State Research Center of Virology and Biotechnology           |
| EPI_ISL_255206 | A/Peregrine_falcon/Hungary/4882/2017        | Central Agricultural Office Veterinary Diagnostic Directorate |
| EPI_ISL_335457 | A/mute_swan/Shimane/3211A002/2017           | National Institute of Animal Health                           |
| EPI_ISL_268667 | A/Sea_eagle/NL-Assen/16015398-002/2016      | Wageningen Bioveterinary Research                             |
| EPI_ISL_267376 | A/mallard_duck/Netherlands/18/2012          | Erasmus Medical Center                                        |
| EPI_ISL_373081 | A/Mallard/Netherlands/21/2013               | Erasmus Medical Center                                        |
| EPI_ISL_267224 | A/mallard_duck/Netherlands/16/2012          | Erasmus Medical Center                                        |
| EPI_ISL_267243 | A/barnacle_goose/Netherlands/2/2014         | Erasmus Medical Center                                        |
| EPI_ISL_243650 | A/mallard_duck/Netherlands/24/2009          | Erasmus Medical Center                                        |
| EPI_ISL_309840 | A/Chicken/Netherlands/12002495-006-010/2012 | Wageningen Bioveterinary Research                             |
| EPI_ISL_309930 | A/Chicken/Netherlands/14016059/2014         | Wageningen Bioveterinary Research                             |
| EPI_ISL_309835 | A/Duck/Netherlands/14016396/2014            | Wageningen Bioveterinary Research                             |
| EPI_ISL_309833 | A/Duck/Netherlands/14015610/2014            | Wageningen Bioveterinary Research                             |
| EPI_ISL_332682 | A/teal/Toguchin/1157/2016                   | State Research Center of Virology and Biotechnology           |
| EPI_ISL_332681 | A/teal/Toguchin/1156/2016                   | State Research Center of Virology and Biotechnology           |
| EPI_ISL_332679 | A/mallard/Toguchin/1154/2016                | State Research Center of Virology and Biotechnology           |
| EPI_ISL_332677 | A/teal/Toguchin/1153/2016                   | State Research Center of Virology and Biotechnology           |
| EPI_ISL_237553 | A/duck/India/10CA01/2016                    | ICAR-National Institute of High Security Animal Diseases      |
| EPI_ISL_292194 | A/Bar-headed_Goose/Qinghai/a88/2016         | Wuhan Institute of Virology                                   |
| EPI_ISL_292331 | A/Bar-headed_Goose/Qinghai/a114/2016        | Wuhan Institute of Virology                                   |
| EPI_ISL_266820 | A/Bean_goose/Hubei/CH-i122/2017_H5N8        | Wuhan Institute of Virology                                   |
| EPI_ISL_266824 | A/Bean_goose/Hubei/CH-i320/2017_H5N8        | Wuhan Institute of Virology                                   |
| EPI_ISL_266821 | A/Bean_goose/Hubei/CH-i119/2017             | Wuhan Institute of Virology                                   |
| EPI_ISL_240110 | A/chicken/Astrakhan/3131/2016               | State Research Center of Virology and Biotechnology           |
| EPI_ISL_255219 | A/White_fronted_goose/Hungary/801/2017      | Central Agricultural Office Veterinary Diagnostic Directorate |
| EPI_ISL_255215 | A/Mute_swan/Hungary/3137/2017               | Central Agricultural Office Veterinary Diagnostic Directorate |
| EPI_ISL_255213 | A/GuineaFowl/Hungary/596/2017               | Central Agricultural Office Veterinary Diagnostic Directorate |
| EPI_ISL_255202 | A/Mute_swan/Hungary/3139/2017               | Central Agricultural Office Veterinary Diagnostic Directorate |
| EPI_ISL_255196 | A/Greylag_goose/Hungary/1941/2017           | Central Agricultural Office Veterinary Diagnostic Directorate |
| EPI_ISL_275433 | A/unknown/Tatarstan/94/2017                 | State Research Center of Virology and Biotechnology           |
| EPI_ISL_275288 | A/chicken/Tatarstan/88/2017                 | State Research Center of Virology and Biotechnology           |
| EPI_ISL_275283 | A/chicken/Shchyolkovo/47/2017               | State Research Center of Virology and Biotechnology           |
| EPI_ISL_256300 | A/chicken/Sergiyev_Posad/39/2017            | State Research Center of Virology and Biotechnology           |
| EPI_ISL_256299 | A/chicken/Sergiyev_Posad/38/2017            | State Research Center of Virology and Biotechnology           |

|                |                                         |                                                               |
|----------------|-----------------------------------------|---------------------------------------------------------------|
| EPI_ISL_275432 | A/unknown/Tatarstan/86/2017             | State Research Center of Virology and Biotechnology           |
| EPI_ISL_322984 | A/Grey_seal/361-10/BalticPL/16          | Stiftung Tierärztliche Hochschule Hannover                    |
| EPI_ISL_257699 | A/Tufted_Duck/Switzerland/V237/2016     | Faculty of Veterinary Medicine at the University of Bern      |
| EPI_ISL_240012 | A/duck/France/161108h/2016              | Agence Nationale De Securite Sanitaire De L'alimentation      |
| EPI_ISL_255933 | A/Cormorant/Hungary/6102/2017           | Central Agricultural Office Veterinary Diagnostic Directorate |
| EPI_ISL_256462 | A/Mute_swan/Hungary/5879/2017           | Central Agricultural Office Veterinary Diagnostic Directorate |
| EPI_ISL_288411 | A/Go/NL-Utrecht/17006881-001/2017       | Wageningen Bioveterinary Research                             |
| EPI_ISL_287565 | A/M_Swan/NL-Groningen/16015826-001/2016 | Wageningen Bioveterinary Research                             |
| EPI_ISL_337151 | A/chicken/Mari_El/870/2018              | State Research Center of Virology and Biotechnology           |
| EPI_ISL_320955 | A/chicken/Cheboksary/851/2018           | State Research Center of Virology and Biotechnology           |
| EPI_ISL_320954 | A/chicken/Cheboksary/850/2018           | State Research Center of Virology and Biotechnology           |
| EPI_ISL_320953 | A/chicken/Cheboksary/849/2018           | State Research Center of Virology and Biotechnology           |
| EPI_ISL_320685 | A/chicken/Samara/679/2018               | State Research Center of Virology and Biotechnology           |
| EPI_ISL_320684 | A/goose/Samara/675/2018                 | State Research Center of Virology and Biotechnology           |
| EPI_ISL_320683 | A/goose/Samara/673/2018                 | State Research Center of Virology and Biotechnology           |
| EPI_ISL_320682 | A/chicken/Kursk/762/2018                | State Research Center of Virology and Biotechnology           |
| EPI_ISL_288439 | A/chicken/Korea/Gimje2/2017             | Animal and Plant Quarantine Agency (S-2145)                   |
| EPI_ISL_292187 | A/Bar-headed_Goose/Qinghai/XX782/2016   | Wuhan Institute of Virology                                   |
| EPI_ISL_292170 | A/Bar-headed_Goose/Qinghai/A22/2016     | Wuhan Institute of Virology                                   |
| EPI_ISL_292495 | A/Bar-headed_Goose/Qinghai/B11/2016     | Wuhan Institute of Virology                                   |
| EPI_ISL_292181 | A/Bar-headed_Goose/Qinghai/A19/2016     | Wuhan Institute of Virology                                   |
| EPI_ISL_292179 | A/Bar-headed_Goose/Qinghai/XX13/2016    | Wuhan Institute of Virology                                   |
| EPI_ISL_292332 | A/water/Qinghai/i34-39/2016             | Wuhan Institute of Virology                                   |
| EPI_ISL_292175 | A/Bar-headed_Goose/Qinghai/XX446/2016   | Wuhan Institute of Virology                                   |
| EPI_ISL_266822 | A/Herring_Gull/Hubei/CH-i149/2017_H5N8  | Wuhan Institute of Virology                                   |
| EPI_ISL_292333 | A/Water/Qinghai/i40-44/2016             | Wuhan Institute of Virology                                   |
| EPI_ISL_255214 | A/Chicken/Hungary/1751/2017             | Central Agricultural Office Veterinary Diagnostic Directorate |
| EPI_ISL_254814 | A/mallard/Hungary/57857/2016            | Central Agricultural Office Veterinary Diagnostic Directorate |
| EPI_ISL_255216 | A/Mallard/Hungary/5821/2017             | Central Agricultural Office Veterinary Diagnostic Directorate |
| EPI_ISL_255192 | A/Goose/Hungary/982/2017                | Central Agricultural Office Veterinary Diagnostic Directorate |
| EPI_ISL_255198 | A/Turkey/Hungary/2030/2017              | Central Agricultural Office Veterinary Diagnostic Directorate |
| EPI_ISL_255190 | A/Mute_swan/Hungary/119/2017            | Central Agricultural Office Veterinary Diagnostic Directorate |
| EPI_ISL_255195 | A/Duck/Hungary/1588/2017                | Central Agricultural Office Veterinary Diagnostic Directorate |
| EPI_ISL_255174 | A/Goose/Hungary/65817/2016              | Central Agricultural Office Veterinary Diagnostic Directorate |
| EPI_ISL_247721 | A/turkey/Rostov-on-Don/11/2017          | State Research Center of Virology and Biotechnology           |
| EPI_ISL_268622 | A/Ch/NL-Abbega/X16015736/2016           | Wageningen Bioveterinary Research                             |
| EPI_ISL_268664 | A/Mal/NL-IJsselmuiden/16015448-002/2016 | Wageningen Bioveterinary Research                             |
| EPI_ISL_253036 | A/turkey/England/003778/2017            | Animal and Plant Health Agency (APHA)                         |
| EPI_ISL_253037 | A/chicken/Wales/000023/2016             | Animal and Plant Health Agency (APHA)                         |
| EPI_ISL_268634 | A/Dk/NL-Stolwijk/16016291-016-020/2016  | Wageningen Bioveterinary Research                             |
| EPI_ISL_255182 | A/turkey/Italy/17VIR538-1/2017          | Istituto Zooprofilattico Sperimentale Delle Venezie           |
| EPI_ISL_288438 | A/chicken/Korea/Gunsan/2017             | Animal and Plant Quarantine Agency (S-2145)                   |
| EPI_ISL_333629 | A/Environment/Fujiansanyuan/08/2017     | Fujian Center for Disease Control and Prevention              |
| EPI_ISL_256301 | A/environment/Kamchatka/18/2016         | State Research Center of Virology and Biotechnology           |
| EPI_ISL_292326 | A/Great_Cormorant/Qinghai/a51/2016      | Wuhan Institute of Virology                                   |

|                |                                          |                                      |
|----------------|------------------------------------------|--------------------------------------|
| EPI_ISL_292192 | A/Bar-headed_Goose/Qinghai/A23/2016      | Wuhan Institute of Virology          |
| EPI_ISL_292191 | A/Bar-headed_Goose/Qinghai/B12/2016      | Wuhan Institute of Virology          |
| EPI_ISL_292188 | A/Great_Cormorant/Qinghai/B82/2016       | Wuhan Institute of Virology          |
| EPI_ISL_224744 | A/Brown-headed_Gull/Qinghai/ZTO3-B/2016  | Wuhan Institute of Virology          |
| EPI_ISL_224743 | A/Brown-headed_Gull/Qinghai/ZTO1-LU/2016 | Wuhan Institute of Virology          |
| EPI_ISL_224734 | A/Bar-headed_Goose/Qinghai/BTY15-LU/2016 | Wuhan Institute of Virology          |
| EPI_ISL_224726 | A/Bar-headed_Goose/Qinghai/BTY11-LU/2016 | Wuhan Institute of Virology          |
| EPI_ISL_224717 | A/Bar-headed_Goose/Qinghai/BTY7-LU1/2016 | Wuhan Institute of Virology          |
| EPI_ISL_288364 | A/chicken/Greece/39_2017b/2017           | Thessalonica Veterinary Centre (TVC) |
| EPI_ISL_292497 | A/Bar-headed_Goose/Qinghai/XXI122/2016   | Wuhan Institute of Virology          |
| EPI_ISL_292330 | A/Bar-headed_Goose/Qinghai/a26/2016      | Wuhan Institute of Virology          |
| EPI_ISL_292327 | A/Bar-headed_Goose/Qinghai/p2/2016       | Wuhan Institute of Virology          |
| EPI_ISL_292237 | A/Bar-headed_Goose/Qinghai/a15/2016      | Wuhan Institute of Virology          |
| EPI_ISL_292231 | A/Bar-headed_Goose/Qinghai/a61/2016      | Wuhan Institute of Virology          |
| EPI_ISL_292190 | A/Bar-headed_Goose/Qinghai/XX111/2016    | Wuhan Institute of Virology          |
| EPI_ISL_292180 | A/Bar-headed_Goose/Qinghai/XX22/2016     | Wuhan Institute of Virology          |
| EPI_ISL_224729 | A/Bar-headed_Goose/Qinghai/BTY13-B/2016  | Wuhan Institute of Virology          |
| EPI_ISL_224715 | A/Bar-headed_Goose/Qinghai/BTY6-LU/2016  | Wuhan Institute of Virology          |
| EPI_ISL_292229 | A/Bar-headed_Goose/Qinghai/a113/2016     | Wuhan Institute of Virology          |
| EPI_ISL_292184 | A/Bar-headed_Goose/Qinghai/B51/2016      | Wuhan Institute of Virology          |
| EPI_ISL_292174 | A/Bar-headed_Goose/Qinghai/XX431/2016    | Wuhan Institute of Virology          |
| EPI_ISL_292176 | A/Bar-headed_Goose/Qinghai/A17/2016      | Wuhan Institute of Virology          |
| EPI_ISL_292235 | A/Bar-headed_Goose/Qinghai/a43/2016      | Wuhan Institute of Virology          |
| EPI_ISL_292232 | A/Bar-headed_Goose/Qinghai/HDT001/2016   | Wuhan Institute of Virology          |
| EPI_ISL_292178 | A/Bar-headed_Goose/Qinghai/A12/2016      | Wuhan Institute of Virology          |
| EPI_ISL_224751 | A/Brown-headed_Gull/Qinghai/ZTO6-MU/2016 | Wuhan Institute of Virology          |
| EPI_ISL_224746 | A/Brown-headed_Gull/Qinghai/ZTO4-B/2016  | Wuhan Institute of Virology          |
| EPI_ISL_224733 | A/Bar-headed_Goose/Qinghai/BTY15-B/2016  | Wuhan Institute of Virology          |
| EPI_ISL_224731 | A/Bar-headed_Goose/Qinghai/BTY14-B/2016  | Wuhan Institute of Virology          |
| EPI_ISL_224730 | A/Bar-headed_Goose/Qinghai/BTY13-LU/2016 | Wuhan Institute of Virology          |
| EPI_ISL_224716 | A/Bar-headed_Goose/Qinghai/BTY7-B/2016   | Wuhan Institute of Virology          |
| EPI_ISL_224725 | A/Bar-headed_Goose/Qinghai/BTY11-B/2016  | Wuhan Institute of Virology          |
| EPI_ISL_224735 | A/Bar-headed_Goose/Qinghai/BTY16-B/2016  | Wuhan Institute of Virology          |
| EPI_ISL_224742 | A/Brown-headed_Gull/Qinghai/ZTO1-B/2016  | Wuhan Institute of Virology          |
| EPI_ISL_291952 | A/Bar-headed_Goose/Qinghai/B44/2016      | Wuhan Institute of Virology          |
| EPI_ISL_292183 | A/Bar-headed_Goose/Qinghai/A13/2016      | Wuhan Institute of Virology          |
| EPI_ISL_292328 | A/Bar-headed_Goose/Qinghai/a45/2016      | Wuhan Institute of Virology          |
| EPI_ISL_292329 | A/Bar-headed_Goose/Qinghai/a27/2016      | Wuhan Institute of Virology          |
| EPI_ISL_292236 | A/Bar-headed_Goose/Qinghai/a24/2016      | Wuhan Institute of Virology          |
| EPI_ISL_292193 | A/Bar-headed_Goose/Qinghai/XX76/2016     | Wuhan Institute of Virology          |
| EPI_ISL_224724 | A/Bar-headed_Goose/Qinghai/BTY10-LU/2016 | Wuhan Institute of Virology          |
| EPI_ISL_224714 | A/Bar-headed_Goose/Qinghai/BTY6-B/2016   | Wuhan Institute of Virology          |
| EPI_ISL_224707 | A/Bar-headed_Goose/Qinghai/BTY2-B/2016   | Wuhan Institute of Virology          |
| EPI_ISL_224708 | A/Bar-headed_Goose/Qinghai/BTY2-LU/2016  | Wuhan Institute of Virology          |
| EPI_ISL_292230 | A/Bar-headed_Goose/Qinghai/a93/2016      | Wuhan Institute of Virology          |

|                |                                                 |                                                     |
|----------------|-------------------------------------------------|-----------------------------------------------------|
| EPI_ISL_224745 | A/Brown-headed_Gull/Qinghai/ZTO3-LU/2016        | Wuhan Institute of Virology                         |
| EPI_ISL_224750 | A/Brown-headed_Gull/Qinghai/ZTO6-SP/2016        | Wuhan Institute of Virology                         |
| EPI_ISL_224749 | A/Brown-headed_Gull/Qinghai/ZTO6-B/2016         | Wuhan Institute of Virology                         |
| EPI_ISL_224736 | A/Bar-headed_Goose/Qinghai/BTY16-LU/2016        | Wuhan Institute of Virology                         |
| EPI_ISL_224741 | A/Bar-headed_Goose/Qinghai/BTY18-MU/2016        | Wuhan Institute of Virology                         |
| EPI_ISL_224732 | A/Bar-headed_Goose/Qinghai/BTY14-LU/2016        | Wuhan Institute of Virology                         |
| EPI_ISL_224740 | A/Bar-headed_Goose/Qinghai/BTY18-LU/2016        | Wuhan Institute of Virology                         |
| EPI_ISL_224739 | A/Bar-headed_Goose/Qinghai/BTY18-B/2016         | Wuhan Institute of Virology                         |
| EPI_ISL_224723 | A/Bar-headed_Goose/Qinghai/BTY10-B/2016         | Wuhan Institute of Virology                         |
| EPI_ISL_292177 | A/Bar-headed_Goose/Qinghai/A20/2016             | Wuhan Institute of Virology                         |
| EPI_ISL_292182 | A/Bar-headed_Goose/Qinghai/A16/2016             | Wuhan Institute of Virology                         |
| EPI_ISL_292185 | A/Great_Cormorant/Qinghai/Y01/2016              | Wuhan Institute of Virology                         |
| EPI_ISL_224718 | A/Bar-headed_Goose/Qinghai/BTY7-LU2/2016        | Wuhan Institute of Virology                         |
| EPI_ISL_224747 | A/Brown-headed_Gull/Qinghai/ZTO5-B/2016         | Wuhan Institute of Virology                         |
| EPI_ISL_224728 | A/Bar-headed_Goose/Qinghai/BTY12-LU/2016        | Wuhan Institute of Virology                         |
| EPI_ISL_224727 | A/Bar-headed_Goose/Qinghai/BTY12-B/2016         | Wuhan Institute of Virology                         |
| EPI_ISL_292238 | A/Bar-headed_Goose/Qinghai/p18/2016             | Wuhan Institute of Virology                         |
| EPI_ISL_292233 | A/Bar-headed_Goose/Qinghai/a91/2016             | Wuhan Institute of Virology                         |
| EPI_ISL_292173 | A/Bar-headed_Goose/Qinghai/B54/2016             | Wuhan Institute of Virology                         |
| EPI_ISL_224720 | A/Bar-headed_Goose/Qinghai/BTY8-LU/2016         | Wuhan Institute of Virology                         |
| EPI_ISL_224719 | A/Bar-headed_Goose/Qinghai/BTY8-B/2016          | Wuhan Institute of Virology                         |
| EPI_ISL_224712 | A/Bar-headed_Goose/Qinghai/BTY4-LU/2016         | Wuhan Institute of Virology                         |
| EPI_ISL_224704 | A/Bar-headed_Goose/Qinghai/BTY1-B/2016          | Wuhan Institute of Virology                         |
| EPI_ISL_224748 | A/Brown-headed_Gull/Qinghai/ZTO5-K/2016         | Wuhan Institute of Virology                         |
| EPI_ISL_224721 | A/Bar-headed_Goose/Qinghai/BTY9-B/2016          | Wuhan Institute of Virology                         |
| EPI_ISL_224722 | A/Bar-headed_Goose/Qinghai/BTY9-LU/2016         | Wuhan Institute of Virology                         |
| EPI_ISL_292496 | A/Bar-headed_Goose/Qinghai/A11/2016             | Wuhan Institute of Virology                         |
| EPI_ISL_292198 | A/Bar-headed_Goose/Qinghai/a115/2016            | Wuhan Institute of Virology                         |
| EPI_ISL_404993 | A/white-fronted Goose/Germany-BB/AI00018/2020   | Friedrich-Loeffler-Institute                        |
| EPI_ISL_410291 | A/chicken/Germany-BW/AI00049/2020               | Friedrich-Loeffler-Institute                        |
| EPI_ISL_405813 | A/hawk/Poland/003/2020                          | National Veterinary Research Institut Poland        |
| EPI_ISL_402134 | A/turkey/Poland/23/2019                         | National Veterinary Research Institut Poland        |
| EPI_ISL_405391 | A/chicken/Czech Republic/1175-1/2020            | State Veterinary Institute Prague                   |
| EPI_ISL_405278 | A/guinea_fowl/Nigeria/OG-GF11T_19VIR8424-7/2019 | Istituto Zooprofilattico Sperimentale Delle Venezie |
